# Supplementary material
Source: publisher figshare collection journal article supplement (https://microbiology.figshare.com/articles/dataset/_/28677704)
Supplement: Supplementary file 1 [file 1]

## Sheet: Table S5
Table S5. Results of the morphometry analyses employed for the quantification of NP expression in UGV-1 infected I/1Ki cell pellet sections stained for viral NP. Freshly UGV-1 inoculated cells (UGV-1) or cells passaged at 15 d post UGV-1 inoculation (UGV-1 P1) at different timepoints and temperatures were pelleted, formalin-fixed and paraffin-embedded. For each pellet, 10 (5 if pellets too small)…
NP expression in cell pellet sections
UGV-1/ UGV-1 P1	Temperature (°C)	Timepoint (day)	Replicate (pellet section)	QuP						QuP+C						UNet								UNet normalized to QuP				UNet normalized to QuP+C
				NP negative cell area (µm2)	NP positive cell area (µm2)	Total area (µm2)	NP positive cell area (%)	Average NP positive cell area (%)	St. dev. NP positive cells area (%)	NP negative cells	NP positive cells	Total cell number	NP positive cells (%)	Average NP positive cells (%)	St. dev. NP positive cells (%)	NP negative cytosolic area (µm2)	NP positive cytosolic area (µm2)	Nucleus area (µm2)	Nuclear count	Total area (µm2)	NP positive cell area (%)	Average NP-positive cell area (%)	St. dev. NP-positive cell area (%)	NP positive cytosolic area (µm2) ratio	Total area (µm2) ratio	NP positive cell area (%) ratio	Average NP positive cell (%) area ratio	Ratio between nuclear count in UNet and total cell number count in QuP+C
UGV-1	24	D3	1	1.72423e+06	41722.4	1765957	2.36259	3.62049	3.21239	25245	5900	31145	18.94	31.0233	18.2354	2.30571e+06	243942	1.48585e+06	18941	4.0355e+06	6.04492	18.1952	13.5667	5.8468	2.28516	2.55859	5.02561	0.608155
			2	2.20802e+06	28114.2	2.23614e+06	1.25727			25705	5854	31559	18.55			1.8547e+06	226754	1.14924e+06	14397	3.2307e+06	7.01871			8.06544	1.44477	5.58252		0.456193
			3	1.347e+06	8755	1.35575e+06	0.645766			26556	3198	29754	10.75			1.44508e+06	64582.5	1.64291e+06	7785	3.15257e+06	2.04857			7.37664	2.32533	3.17231		0.261645
			4	2.17061e+06	91803.1	2.26241e+06	4.05775			13997	9705	23702	40.95			1.31457e+06	479415	779532	11210	2.57352e+06	18.6288			5.22221	1.13751	4.59092		0.472956
			5	2.38835e+06	151015	2.53937e+06	5.94694			12840	11565	24405	47.39			1.45621e+06	532808	487984	11472	2.477e+06	21.5102			3.52819	0.975441	3.61702		0.470068
			6	2.00034e+06	149734	2.15007e+06	6.96415			9079	8105	17184	47.17			1.02406e+06	447409	491415	9895	1.96288e+06	22.7935			2.98802	0.912939	3.27297		0.575826
			7	1.96658e+06	21127.4	1.98771e+06	1.0629			15898	3628	19526	18.58			1.22304e+06	127976	657479	10255	2.00849e+06	6.37177			6.05737	1.01046	5.99468		0.525197
			8	1.92026e+06	66735	1.98699e+06	3.35859			11903	6470	18373	35.21			931888	314207	545106	9930	1.7912e+06	17.5417			4.70828	0.901464	5.22293		0.540467
			9	1921914	217662	2.13958e+06	10.1731			8211	13998	22209	63.03			550556	776266	604287	9990	1.93111e+06	40.1979			3.56638	0.902566	3.95138		0.449818
			10	1.64372e+06	6199.8	1.64992e+06	0.375764			18108	1937	20045	9.663			632799	823795	613471	9318	2.07006e+06	39.7956			132.874	1.25465	105.906		0.464854
UGV-1	24	D6	1	2228111	111564	2.33968e+06	4.76837	13.7121	8.48197	21571	11946	33517	35.64	62.718	18.1507	1.86966e+06	389230	1.49441e+06	19434	3.7533e+06	10.3703	33.7424	15.0239	3.48884	1.6042	2.17482	2.46078	0.579825
			2	2.20572e+06	326547	2532269	12.8954			14755	18724	33479	55.93			1.28805e+06	975769	758782	15495	3.0226e+06	32.2824			2.98814	1.19363	2.5034		0.462827
			3	2354424	57384.9	2.41181e+06	2.37933			18897	8430	27327	30.85			1.12724e+06	246839	1.4859e+06	8076	2.85998e+06	8.63078			4.30146	1.18582	3.6274		0.295532
			4	2.32531e+06	303945	2.62925e+06	11.5601			9067	16948	26015	65.15			1.09413e+06	910909	475830	11737	2.48087e+06	36.7173			2.99695	0.943565	3.1762		0.451163
			5	2.22611e+06	295609	2.52172e+06	11.7225			10256	16224	26480	61.27			1.13696e+06	847186	514777	12795	2.49892e+06	33.902			2.8659	0.990961	2.89204		0.483195
			6	1.32457e+06	683205	2.00778e+06	34.0279			1368	12782	14150	90.33			403483	1.00132e+06	336805	8001	1.7416e+06	57.4939			1.46561	0.867427	1.68961		0.565442
			7	1.79682e+06	364328	2.16114e+06	16.8581			5014	15885	20899	76.01			546167	854317	527555	8821	1.92804e+06	44.3101			2.34491	0.892138	2.62842		0.422078
			8	1.65192e+06	245279	1.8972e+06	12.9285			5511	11431	16942	67.47			587273	581194	355361	8177	1.52383e+06	38.1404			2.36952	0.8032	2.9501		0.482647
			9	1.66954e+06	265142	1934678	13.7047			6047	13618	19665	69.25			436985	722623	432259	8278	1.59187e+06	45.3947			2.72542	0.822808	3.31234		0.420951
			10	1.86717e+06	362976	2230149	16.2759			5293	16116	21409	75.28			769043	699885	849985	7569	2.31891e+06	30.1816			1.92819	1.0398	1.85438		0.353543
UGV-1	26	D3	1	2.71687e+06	159857	2.87673e+06	5.55691	1.52823	1.52082	15374	12611	27985	45.06	20.16	12.0298	3.26344e+06	803347	1.33123e+06	21154	5.39801e+06	14.8823	5.43054	4.25447	5.02541	1.87644	2.67815	3.55348	0.755905
			2	2.01312e+06	21833.9	2.03496e+06	1.07294			26323	2062	28385	7.264			3.65783e+06	118764	1.45234e+06	21192	5.22893e+06	2.27128			5.43942	2.56955	2.11687		0.746592
			3	3.11382e+06	7680.4	3.1215e+06	0.246048			27707	2408	30116	7.996			2.84841e+06	71044.7	2.60657e+06	13735	5.52602e+06	1.28564			9.25014	1.77031	5.22515		0.45607
			4	1.22588e+06	19618.7	1.2455e+06	1.57517			24850	2821	27672	10.19			3.69998e+06	91269.9	1.42728e+06	19171	5.21853e+06	1.74896			4.65219	4.18992	1.11033		0.692794
			5	3.49465e+06	50834.2	3.54548e+06	1.43377			22367	6343	28710	22.09			3.60092e+06	257585	1.45304e+06	22907	5.31155e+06	4.84954			5.06717	1.49812	3.38236		0.797875
			6	3.85909e+06	61508.3	3.92059e+06	1.56885			20661	6290	26952	23.34			2.1948e+06	304146	1.39709e+06	19987	3.89604e+06	7.80654			4.9448	0.993738	4.97596		0.741578
			7	4.02471e+06	31122.8	4.05583e+06	0.767359			21739	5545	27284	20.32			1.91708e+06	220955	1.54294e+06	21121	3.68097e+06	6.00262			7.09945	0.907575	7.82244		0.774117
			8	4.58934e+06	19026.5	4.60837e+06	0.412869			26342	4425	30768	14.38			3.04212e+06	123771	1.53494e+06	20039	4.70083e+06	2.63296			6.50518	1.02006	6.37722		0.651294
			9	4832988	33367.7	4.86636e+06	0.685681			24624	4830	29454	16.4			3.24697e+06	171830	1.46891e+06	20896	4.88771e+06	3.51555			5.14958	1.00439	5.12708		0.709445
			10	3.54948e+06	71060.3	3.62054e+06	1.9627			15056	7950	23006	34.56			2.28686e+06	352757	1.14938e+06	20847	3.78899e+06	9.31005			4.96419	1.04653	4.74349		0.906155
UGV-1	26	D6	1	6.12478e+06	330558	6.45533e+06	5.12069	5.6319	4.11043	30404	23553	53957	43.65	45.362	14.7839	4.76245e+06	1.16101e+06	2.95603e+06	39842	8.87949e+06	13.0752	17.9067	9.70928	3.51227	1.37553	2.5534	3.17951	0.738403
			2	4.12019e+06	540209	4.6604e+06	11.5915			23333	29835	53168	56.11			3.34925e+06	1.79855e+06	1.72845e+06	31780	6.87625e+06	26.156			3.32936	1.47546	2.25648		0.597728
			3	6.42405e+06	306646	6.73069e+06	4.55594			30297	20979	51276	40.91			3.58694e+06	1.0568e+06	3.28466e+06	29178	7.9284e+06	13.3293			3.44633	1.17795	2.9257		0.569038
			4	4.52165e+06	133308	4.65495e+06	2.86379			27450	11451	38901	29.44			4.73775e+06	706140	1.58376e+06	29905	7.02765e+06	10.048			5.29705	1.50971	3.50865		0.768746
			5	4660067	77718.6	4.73779e+06	1.6404			31304	9673	40977	23.61			4.63936e+06	456956	2.53489e+06	33244	7.63121e+06	5.988			5.87963	1.61071	3.65033		0.811284
			6	7.14314e+06	288800	7.43194e+06	3.88593			25545	20643	46189	44.69			3.54542e+06	1.17119e+06	2.27398e+06	29445	6.99058e+06	16.7537			4.05534	0.940613	4.31138		0.637489
			7	6.91911e+06	362936	7.28205e+06	4.98398			23543	22626	46169	49.01			3.18935e+06	1.35323e+06	2.17514e+06	29995	6.71772e+06	20.1442			3.72857	0.922504	4.0418		0.649678
			8	7.35876e+06	302667	7.66142e+06	3.95053			22849	23509	46358	50.71			3.31438e+06	1.3438e+06	2.07897e+06	29702	6.73715e+06	19.9461			4.43985	0.87936	5.04896		0.640709
			9	7.35389e+06	242373	7.59626e+06	3.19069			21921	13631	35552	38.34			3.85779e+06	911532	2.06435e+06	28530	6.83367e+06	13.3388			3.76086	0.899609	4.18055		0.802486
			10	6.99961e+06	1.19048e+06	8190087	14.5356			10420	35175	45595	77.15			2.56908e+06	2.86949e+06	1.68392e+06	29248	7.12249e+06	40.2877			2.41037	0.869648	2.77166		0.641474
UGV-1 P1	26	D3	1	7.34083e+06	98778.5	7.43961e+06	1.32774	3.97626	6.90022	21621	11283	32904	34.29	36.7447	20.8292	4.8596e+06	536302	1.99882e+06	24291	7.39472e+06	7.2525	13.5677	14.9783	5.42934	0.993966	5.46229	3.41218	0.738239
			2	4.00506e+06	172227	4.17728e+06	4.12294			21314	9167	30481	30.07			3.86315e+06	794100	1.5186e+06	22167	6.17585e+06	12.8581			4.61078	1.47844	3.11868		0.72724
			3	4.54239e+06	1.38603e+06	5.92842e+06	23.3795			4407	18358	22765	80.64			1.59107e+06	3.17835e+06	1.1376e+06	19555	5.90702e+06	53.8063			2.29313	0.996389	2.30144		0.858994
			4	1.71074e+06	10676.1	1.72142e+06	0.620192			18867	1678	20545	8.167			3.85741e+06	64688.8	1.46286e+06	17242	5.38496e+06	1.20129			6.05921	3.12821	1.93696		0.839231
			5	1.76496e+06	29601.3	1.79456e+06	1.6495			17148	2965	20113	14.74			3.91867e+06	178226	981595	16538	5.07849e+06	3.50942			6.02087	2.82994	2.12757		0.822254
			6	5.03641e+06	34248.8	5.07065e+06	0.675432			16247	4334	20581	21.06			3.14821e+06	208766	1.52588e+06	14443	4.88285e+06	4.27549			6.09557	0.962963	6.33001		0.701764
			7	4.66247e+06	68526.4	4.73099e+06	1.44846			13525	7821	21346	36.64			2.81607e+06	559905	1.37948e+06	16160	4.75545e+06	11.774			8.17064	1.00517	8.12862		0.757051
			8	4.99938e+06	64465.9	5.06384e+06	1.27306			11687	10508	22195	47.34			3.2238e+06	553538	1.17143e+06	16572	4.94878e+06	11.1854			8.58653	0.977277	8.78618		0.746655
			9	4.55326e+06	134856	4.68812e+06	2.87654			7892	5804	13696	42.38			2.5058e+06	581522	1.3595e+06	11208	4.44682e+06	13.0773			4.31218	0.94853	4.54617		0.818341
			10	4.90183e+06	119983	5.02181e+06	2.38924			9132	9940	19072	52.12			2.95629e+06	797455	1.0108e+06	15584	4.76455e+06	16.7372			6.64638	0.948771	7.00525		0.817114
UGV-1 P1	26	D6	1	1.02761e+07	133038	1.04092e+07	1.27808	2.07644	1.68092	39267	9537	48806	19.54	24.4247	11.2654	7664532	486009	3413615	41742	1.15642e+07	4.20272	9.07016	6.11458	3.65317	1.11096	3.28831	4.36814	0.855264
			2	6.39036e+06	288275	6.67864e+06	4.31638			39294	25376	64670	39.24			5.00685e+06	1.61278e+06	2.25048e+06	39612	8.87011e+06	18.1822			5.5946	1.32813	4.21239		0.612525
			3	7.53733e+06	464071	8.0014e+06	5.79987			29811	23042	52853	43.6			4.5569e+06	1.49888e+06	2.52967e+06	37576	8.58545e+06	17.4584			3.22985	1.07299	3.01013		0.710953
			4	1.52768e+06	30053.5	1.55774e+06	1.9293			44965	4424	49389	8.957			5.93613e+06	149387	1.15512e+06	30977	7.24064e+06	2.06317			4.97069	4.64818	1.06939		0.627204
			5	3890622	65323.1	3.95595e+06	1.65126			39881	9020	48901	18.45			5.12186e+06	358043	2.07763e+06	36073	7.55753e+06	4.73756			5.4811	1.91042	2.86905		0.737674
			6	7.81617e+06	67917.1	7.88409e+06	0.861445			42827	11930	54757	21.79			4.59676e+06	541570	2.50799e+06	34756	7.64632e+06	7.08276			7.97399	0.969841	8.22195		0.634732
			7	8.01571e+06	140318	8.15603e+06	1.72042			39369	15718	55087	28.53			4.12421e+06	1.02723e+06	2.33346e+06	33767	7.4849e+06	13.7241			7.32076	0.917714	7.97717		0.612976
			8	7.58042e+06	32189.6	7.61261e+06	0.422846			44175	7325	51502	14.22			5.07554e+06	257084	2.15364e+06	33133	7.48627e+06	3.43407			7.98655	0.983403	8.12134		0.643334
			9	8.36805e+06	78205.3	8.44625e+06	0.925917			32399	6621	39020	16.97			5.06577e+06	449284	2.15046e+06	31528	7.66551e+06	5.8611			5.74492	0.907564	6.33005		0.807996
			10	8.97757e+06	170040	9.14761e+06	1.85885			35674	17534	53208	32.95			4.41184e+06	1.08446e+06	2.27455e+06	30022	7.77085e+06	13.9555			6.37769	0.849495	7.50762		0.564238
UGV-1	28	D3	1	3.74801e+06	256733	4.00474e+06	6.41072	6.47471	3.8505	17587	10099	27686	36.48	51.413	16.2715	2.59776e+06	800973	974379	18211	4.37311e+06	18.3159	17.7706	9.01089	3.11987	1.09198	2.85707	2.74462	0.657769
			2	2.37759e+06	249766	2.62735e+06	9.50638			15789	17453	33242	52.5			1.4941e+06	836737	843401	16939	3.17424e+06	26.3602			3.35009	1.20815	2.7729		0.509566
			3	1.90897e+06	83804.6	1.99278e+06	4.20542			19941	10844	30785	35.22			1.57712e+06	350988	1.42291e+06	14692	3.35102e+06	10.474			4.18817	1.68158	2.49061		0.477245
			4	1.76773e+06	18178.7	1.78591e+06	1.0179			15074	4606	19680	23.4			1.51317e+06	144220	999530	10515	2.65692e+06	5.4281			7.93347	1.48771	5.33267		0.534299
			5	2.32472e+06	114884	2439604	4.70911			7761	9494	17255	55.02			1.52154e+06	531256	500620	10790	2.55342e+06	20.8056			4.6243	1.04665	4.41817		0.625326
			6	1.94975e+06	312957	2262707	13.8311			4267	11694	15961	73.27			871623	677807	616634	8554	2.16606e+06	31.2921			2.16581	0.957289	2.26244		0.535931
			7	2.22993e+06	126587	2.35651e+06	5.37178			6856	8617	15473	55.69			1.21401e+06	486079	541537	9414	2.24162e+06	21.6843			3.83989	0.951245	4.0367		0.608415
			8	2.19719e+06	115919	2.31311e+06	5.01138			6510	9001	15511	58.03			1.08955e+06	511628	574160	8752	2.17534e+06	23.5195			4.41368	0.940438	4.69322		0.564245
			9	2.28298e+06	86544.6	2.36953e+06	3.6524			9500	9327	18827	49.54			1.52337e+06	380013	397341	9204	2.30072e+06	16.5171			4.39095	0.970964	4.52226		0.488872
			10	2160885	267918	2.4288e+06	11.0309			4492	13462	17954	74.98			1.21893e+06	65628.1	698578	10120	1.98313e+06	3.30931			0.244955	0.816506	0.300004		0.563663
UGV-1	28	D6	1	5603464	119768	5.72323e+06	2.09266	7.82533	4.52526	34187	4464	38652	11.55	64.608	21.5926	4.30928e+06	460589	1.26762e+06	31633	6.03749e+06	7.62882	29.5635	12.587	3.8457	1.05491	3.64552	3.77792	0.818405
			2	3874288	518826	4.39311e+06	11.81			13638	40184	53823	74.66			1.5814e+06	1.81355e+06	1.1142e+06	27415	4.50915e+06	40.2194			3.4955	1.02641	3.40554		0.509355
			3	3018914	185215	3.20413e+06	5.78052			21866	29462	51329	57.4			1.61598e+06	844590	1.90408e+06	31253	4.36465e+06	19.3507			4.56004	1.36219	3.34757		0.608876
			4	2.99802e+06	157558	3.15558e+06	4.99299			7013	12813	19827	64.63			1.68221e+06	851276	1.18343e+06	24763	3.71692e+06	22.9028			5.40294	1.17789	4.58698		1.24895
			5	3.13938e+06	78375.4	3.21776e+06	2.43572			19696	19136	38833	49.28			2.10718e+06	481505	884881	22112	3.47357e+06	13.862			6.14357	1.0795	5.69112		0.569413
			6	3265964	586107	3.85207e+06	15.2154			4606	26663	31272	85.27			948821	1.52652e+06	1.1534e+06	15795	3.62873e+06	42.0674			2.6045	0.942021	2.7648		0.505084
			7	3.45559e+06	231932	3.68753e+06	6.28963			9345	23742	33090	71.76			1.43495e+06	1.17412e+06	777304	18507	3.38637e+06	34.6718			5.06235	0.918332	5.51254		0.559293
			8	3.59769e+06	230675	3.82837e+06	6.02541			9096	23897	32994	72.43			1.37856e+06	1.22367e+06	853352	17749	3.45558e+06	35.4113			5.30472	0.902625	5.87699		0.537946
			9	3.40306e+06	504206	3.90727e+06	12.9043			7909	27467	35379	77.64			1.15332e+06	1.52683e+06	942261	17096	3.6224e+06	42.1495			3.02818	0.927093	3.26632		0.483225
			10	3.51777e+06	421799	3.93957e+06	10.7067			6223	27334	33560	81.46			1.03774e+06	1.36289e+06	1.2463e+06	16714	3.64692e+06	37.3709			3.23113	0.925717	3.49041		0.498033
UGV-1 P1	28	D3	1	3.13436e+06	197623	3.33199e+06	5.93109	12.8037	6.06037	15687	17023	32710	52.04	70.156	13.7228	1.98183e+06	624801	1.06722e+06	18747	3.67385e+06	17.0067	36.9831	11.4344	3.16158	1.1026	2.86738	2.88848	0.573127
			2	2.22834e+06	456474	2.68482e+06	17.0021			5364	20450	25814	79.22			660429	1.12445e+06	851640	14488	2.63652e+06	42.6491			2.46334	0.982012	2.50847		0.561246
			3	2.46595e+06	171785	2.63773e+06	6.5126			11254	16062	27316	58.8			585701	712344	586673	13188	1.88472e+06	37.7958			4.14672	0.714522	5.80349		0.482794
			4	2.01829e+06	453770	2.47206e+06	18.356			4144	18938	23082	82.05			785090	1.0359e+06	537953	11522	2.35894e+06	43.9138			2.28288	0.954243	2.39234		0.499177
			5	1.97451e+06	382172	2.35668e+06	16.2165			4103	15136	19239	78.67			737910	993733	550166	11478	2.28181e+06	43.5502			2.60023	0.968231	2.68554		0.596601
UGV-1 P1	28	D6	1	3349186	438148	3.78733e+06	11.5688	19.7318	7.94408	10823	23309	34132	68.29	79.269	11.4483	1.20132e+06	1.01123e+06	1.25085e+06	17895	3.4634e+06	29.1976	44.1881	10.7232	2.30797	0.91447	2.52383	2.23943	0.524288
			2	1.89864e+06	473129	2.37177e+06	19.9483			7200	22214	29414	75.52			372201	1.01521e+06	798783	14404	2.1862e+06	46.4373			2.14574	0.921757	2.32788		0.489699
			3	1695534	247477	1.94301e+06	12.7368			7066	16057	23123	69.44			892843	700304	1.20675e+06	14495	2.7999e+06	25.0117			2.82978	1.44101	1.96374		0.626865
			4	1.39108e+06	167605	1.55868e+06	10.753			6737	12867	19604	65.63			457087	544421	434939	10213	1.43645e+06	37.9005			3.24824	0.921576	3.52466		0.520965
			5	1.29251e+06	197834	1.49034e+06	13.2744			6400	12713	19114	66.51			326113	541474	405390	10392	1.27298e+06	42.536			2.73701	0.854152	3.20436		0.543685
			6	751734	329395	1.08113e+06	30.4677			721	9081	9802	92.64			46666	437713	331408	3995	815787	53.6553			1.32884	0.754569	1.76106		0.40757
			7	490224	114956	605180	18.9954			855	5213	6068	85.91			42732.1	189808	108091	2975	340632	55.7224			1.65114	0.56286	2.93348		0.490277
			8	626320	317351	943671	33.6294			414	9204	9618	95.7			35410.9	373939	259580	4061	668930	55.901			1.17831	0.708859	1.66227		0.422229
			9	378751	111530	490281	22.7482			733	4389	5122	85.69			25185.4	136834	138369	2255	300388	45.5523			1.22688	0.612686	2.00246		0.440258
			10	496676	150006	646682	23.1963			841	5812	6653	87.36			33588.1	200420	167100	2859	401109	49.9666			1.33608	0.620256	2.15407		0.429731
UGV-1	30	D3	1	5.33311e+06	208958	5.54207e+06	3.77039	2.97065	3.0167	46236	10210	56446	18.09	20.0247	11.1063	4.12101e+06	507356	2.42694e+06	42602	7.05531e+06	7.19112	12.0305	8.34627	2.42803	1.27305	1.90726	4.0498	0.754739
			2	4626256	571482	5.19774e+06	10.9948			33834	25546	59380	43.02			2.89508e+06	1.49163e+06	1.40623e+06	32733	5.79294e+06	25.7492			2.61012	1.11451	2.34194		0.551246
			3	3.93337e+06	69449.8	4.00282e+06	1.73502			57985	6457	64443	10.02			4.17538e+06	279500	2.42147e+06	42087	6.87635e+06	4.06465			4.02449	1.71788	2.34271		0.653089
			4	4.04457e+06	35697.9	4.08027e+06	0.87489			57636	5167	62803	8.227			4.61392e+06	234180	2.64641e+06	37686	7.49451e+06	3.12469			6.56005	1.83677	3.57152		0.600067
			5	3.94857e+06	50121.2	3.99869e+06	1.25344			55671	6420	62092	10.34			4.61511e+06	280509	2.32682e+06	39364	7.22244e+06	3.88385			5.59661	1.8062	3.09855		0.633963
			6	6.88739e+06	115543	7.00293e+06	1.64993			52446	11084	63530	17.45			2.63237e+06	806917	1.84638e+06	30673	5.28567e+06	15.2661			6.98367	0.754779	9.2526		0.482811
			7	6.97812e+06	274793	7.25291e+06	3.78872			42346	15941	58287	27.35			3.30559e+06	883705	1.78343e+06	35816	5.97272e+06	14.7957			3.21589	0.823493	3.90519		0.614477
			8	7.38127e+06	183559	7.56483e+06	2.42648			44960	16036	60996	26.29			2.53892e+06	1.1872e+06	1.27909e+06	27046	5.00522e+06	23.7194			6.46771	0.661643	9.77522		0.443406
			9	7.51176e+06	54341	7.5661e+06	0.718217			53169	6718	59889	11.22			3.6489e+06	374593	1.97633e+06	33118	5.99982e+06	6.24341			6.89338	0.792987	8.69293		0.55299
			10	7.19685e+06	184122	7.38097e+06	2.49455			44246	17412	61659	28.24			2.87633e+06	938994	1.957e+06	35475	5.77232e+06	16.2672			5.09985	0.782054	6.5211		0.575342
UGV-1	30	D6	1	5.1361e+06	456259	5.59236e+06	8.15862	6.72792	5.61261	49817	23586	73403	32.13	37.672	14.8494	4.33188e+06	1.39748e+06	3.00875e+06	48681	8.73811e+06	15.993	20.7545	12.8923	3.06292	1.56251	1.96026	3.08482	0.663202
			2	5.17404e+06	1238306	6.41235e+06	19.3113			29038	39739	68777	57.78			2.52902e+06	2.58519e+06	1.49244e+06	35875	6.60665e+06	39.1302			2.08768	1.0303	2.02629		0.521613
			3	5.40228e+06	233573	5.63585e+06	4.14442			49162	20386	69548	29.31			3.77903e+06	1.0097e+06	2.74759e+06	39088	7.53633e+06	13.3978			4.32286	1.33721	3.23274		0.562029
			4	4.33934e+06	25203.2	4.36455e+06	0.577453			51056	9208	60265	15.28			3.75565e+06	293513	2.9569e+06	31307	7.00605e+06	4.18943			11.6459	1.60522	7.25501		0.519489
			5	3.65772e+06	149231	3.80695e+06	3.91996			42884	17294	60178	28.74			3.65693e+06	889590	1.86915e+06	34689	6.41567e+06	13.8659			5.96116	1.68525	3.53725		0.57644
			6	6.09222e+06	140799	6.23302e+06	2.25892			40172	15541	55713	27.89			3.41947e+06	568489	2.26132e+06	36894	6.24927e+06	9.09687			4.03759	1.00261	4.02708		0.662215
			7	6.21149e+06	730952	6.94244e+06	10.5287			26796	25526	52322	48.79			2.01614e+06	1.74855e+06	1.72965e+06	27892	5.49433e+06	31.8246			2.39215	0.791413	3.02264		0.533084
			8	6.30625e+06	253822	6.56007e+06	3.86919			34568	19248	53817	35.77			3.17285e+06	922998	1.89302e+06	32702	5.98887e+06	15.4119			3.6364	0.912928	3.98323		0.607652
			9	6.3546e+06	233284	6.58788e+06	3.54111			33054	19720	52775	37.37			2.55303e+06	1.10193e+06	1.31124e+06	26118	4.9662e+06	22.1886			4.72356	0.753839	6.266		0.494893
			10	6.0774e+06	748800	6826201	10.9695			19639	34398	54037	63.66			1.61643e+06	2.15523e+06	1.30588e+06	26870	5.07755e+06	42.4463			2.87825	0.743832	3.86949		0.497252
UGV-1 P1	30	D3	1	8.20753e+06	4.11753e+06	1.23251e+07	33.4078	6.01255	9.84131	4019	79513	83533	95.19	38.396	21.9626	1.53095e+06	6.8027e+06	1.90697e+06	46651	1.02406e+07	66.4286	18.9097	17.5274	1.65213	0.830879	1.98842	3.14503	0.558474
			2	8.50317e+06	672512	9.17568e+06	7.32929			35531	45828	81359	56.33			4.23085e+06	2.03562e+06	1.07136e+06	40877	7.33783e+06	27.7414			3.02689	0.799704	3.78501		0.502428
			3	7.84777e+06	198162	8.04593e+06	2.46288			60829	24133	84963	28.4			4.23583e+06	930103	3.34874e+06	58244	8.51468e+06	10.9235			4.69366	1.05826	4.43527		0.685522
			4	3.90036e+06	127083	4.02745e+06	3.15541			65264	18081	83345	21.69			6.02622e+06	729804	2.356e+06	49704	9.11203e+06	8.00924			5.74275	2.26248	2.53825		0.596365
			5	4.81747e+06	301227	5.1187e+06	5.88483			55090	27608	82698	33.38			5.11924e+06	1.13533e+06	2.11534e+06	48058	8.36991e+06	13.5644			3.769	1.63516	2.30497		0.581127
			6	1.14713e+07	151919	1.16233e+07	1.30703			53341	22460	75801	29.63			5.06576e+06	996551	3.26815e+06	39593	9.33046e+06	10.6806			6.55975	0.80274	8.1717		0.522328
			7	1.19277e+07	206112	1.21338e+07	1.69865			53840	26825	80665	33.25			5.52662e+06	1.10517e+06	2.84657e+06	43707	9.47836e+06	11.66			5.36201	0.78115	6.86424		0.541834
			8	1.15584e+07	221641	1.178e+07	1.8815			58791	22059	80850	27.28			4.94678e+06	1.0337e+06	2.98164e+06	45185	8.96211e+06	11.5341			4.66384	0.760789	6.13027		0.558874
			9	1.08521e+07	141338	1.09934e+07	1.28566			55388	22181	77571	28.6			4.70196e+06	1.13622e+06	2.22487e+06	42168	8.06305e+06	14.0917			8.03904	0.733445	10.9607		0.543605
			10	1.1495e+07	200277	1.16953e+07	1.71246			57327	24813	82140	30.21			4.99105e+06	1.20268e+06	2.12181e+06	45439	8.31555e+06	14.4631			6.0051	0.711017	8.44579		0.55319
UGV-1 P1	30	D6	1	5.46057e+06	4471820	9.93239e+06	45.0226	9.62407	12.9938	310	48588	48898	99.37	42.734	22.9634	432392	6.96047e+06	1.83797e+06	36169	9.23084e+06	75.4046	20.9168	19.6975	1.55652	0.929367	1.67482	2.17339	0.739683
			2	4.22534e+06	405577	4.63091e+06	8.75803			29273	20027	49300	40.62			4.41637e+06	1.41513e+06	1.90302e+06	37915	7.73451e+06	18.2963			3.48918	1.67019	2.08909		0.769067
			3	8.9538e+06	471985	9.42579e+06	5.00738			26920	27076	53996	50.14			5.94962e+06	2.01574e+06	2.96283e+06	45853	1.09282e+07	18.4453			4.27077	1.15939	3.68363		0.849193
			4	1.09373e+06	104817	1198543	8.74536			42555	9310	51865	17.95			6.5366e+06	608588	2.04393e+06	48589	9.18912e+06	6.62292			5.8062	7.66691	0.757307		0.936836
			5	1.15791e+06	185745	1.34365e+06	13.8239			36615	12717	49333	25.78			4.8576e+06	718553	1.1569e+06	38625	6.73305e+06	10.672			3.86849	5.011	0.772		0.782944
			6	7.82478e+06	115599	7.94038e+06	1.45583			34320	11594	45914	25.25			5.16761e+06	881098	2.60893e+06	37352	8.65764e+06	10.1771			7.62204	1.09033	6.99057		0.813521
			7	1.04179e+07	436022	1.08539e+07	4.01719			23442	24140	47583	50.73			5.328e+06	1.87463e+06	2.68874e+06	38452	9.89137e+06	18.9522			4.29939	0.911319	4.71777		0.808104
			8	1.01735e+07	249725	1.04232e+07	2.39585			30903	13621	44524	30.59			5.58145e+06	1.20073e+06	2.84252e+06	40261	9.6247e+06	12.4755			4.80818	0.923388	5.20711		0.904254
			9	9.6594e+06	416853	1.00763e+07	4.13699			20566	19673	40240	48.89			4.81366e+06	1.87333e+06	2.51036e+06	38084	9.19735e+06	20.3681			4.49398	0.912775	4.92342		0.946421
			10	8.98724e+06	266278	9.25352e+06	2.87759			30086	18456	48542	38.02			4.60216e+06	1.53004e+06	2.48576e+06	42282	8.61797e+06	17.7541			5.74603	0.931318	6.16978		0.87104
UGV-1	32	D3	1	4.22253e+06	249426	4.47195e+06	5.57757	6.36567	5.58457	14833	16363	31196	52.45	44.4985	21.0026	2.41594e+06	942267	1.31246e+06	19815	4.67067e+06	20.1741	18.2933	11.1532	3.77774	1.04444	3.61702	2.87375	0.635178
			2	3417874	415573	3.83345e+06	10.8407			16067	20947	37014	56.59			1.5935e+06	1.04498e+06	1.47661e+06	16920	4.11509e+06	25.394			2.51456	1.07347	2.34246		0.457124
			3	2.81718e+06	113325	2.93051e+06	3.86708			22032	12302	34334	35.83			1.64808e+06	495558	1.74018e+06	13073	3.88383e+06	12.7595			4.3729	1.32531	3.29953		0.38076
			4	2.3479e+06	27566.6	2.37547e+06	1.16047			27176	5764	32940	17.5			2.06177e+06	183706	1.33665e+06	13901	3.58213e+06	5.12841			6.66409	1.50797	4.41925		0.42201
			5	3.11224e+06	209314	3.32155e+06	6.30168			17932	15114	33046	45.74			2.08472e+06	735443	731156	17106	3.55132e+06	20.709			3.51359	1.06917	3.28627		0.517642
			6	2935750	661680	3.59743e+06	18.3931			5522	16356	21878	74.76			1.2891e+06	1.28104e+06	826333	15806	3.39648e+06	37.7167			1.93604	0.94414	2.05059		0.722461
			7	3.47242e+06	232183	3.7046e+06	6.26743			8813	13463	22278	60.44			1.82058e+06	814646	992727	16095	3.62795e+06	22.4547			3.50863	0.97931	3.58276		0.722462
			8	3.34272e+06	34243.1	3376963	1.01402			18353	9336	27689	33.72			1.87849e+06	310661	1.14599e+06	15436	3.33515e+06	9.31477			9.07224	0.987618	9.18598		0.557478
			9	2.97927e+06	335852	3.31512e+06	10.1309			8366	13019	21385	60.88			1.40339e+06	886198	881774	14855	3.17137e+06	27.9437			2.63866	0.956636	2.75827		0.694646
			10	2.93073e+06	3043.3	2.93378e+06	0.103733			20346	1549	21896	7.075			1.88727e+06	41558.6	1.17665e+06	12539	3.10548e+06	1.33823			13.6558	1.05853	12.9007		0.572662
UGV-1	32	D6	1	4.76424e+06	655579	5.41982e+06	12.0959	13.883	6.53232	14576	44326	58902	75.25	71.71	15.8649	1.90781e+06	2.27131e+06	1.71983e+06	34699	5.89895e+06	38.5037	39.6565	13.05	3.46459	1.0884	3.18319	2.85648	0.589097
			2	4.6646e+06	1.29584e+06	5.96044e+06	21.7406			11926	52755	64681	81.56			997816	2.88512e+06	2.11975e+06	29557	6.00269e+06	48.0638			2.22646	1.00709	2.21079		0.456966
			3	3.80579e+06	860292	4.66608e+06	18.4371			14762	48672	63434	76.73			1.39448e+06	2.46332e+06	1.70685e+06	31211	5.56464e+06	44.2673			2.86335	1.19257	2.40099		0.492023
			4	3.00817e+06	35192.5	3.04336e+06	1.15637			45112	19357	64469	30.03			3.34691e+06	354536	1.67985e+06	34879	5.3813e+06	6.58829			10.0742	1.76821	5.6974		0.54102
			5	5.29539e+06	501980	5.79737e+06	8.65875			24196	40790	64986	62.77			2.45145e+06	1.88572e+06	1.2704e+06	34376	5.60758e+06	33.6281			3.75657	0.967262	3.88372		0.528975
			6	5.31375e+06	1.52828e+06	6.84203e+06	22.3367			8348	46067	54415	84.66			1.32253e+06	3.2036e+06	1.47748e+06	31111	6.00361e+06	53.3613			2.09621	0.87746	2.38895		0.571736
			7	5.81052e+06	600727	6.41125e+06	9.36989			17179	42580	59759	71.25			1.70071e+06	2.16242e+06	1.72655e+06	31750	5.58968e+06	38.6859			3.59967	0.871855	4.12875		0.531301
			8	5.42364e+06	840965	6.2646e+06	13.4241			12768	47784	60552	78.91			1.37107e+06	2.44872e+06	1.90442e+06	31135	5.72422e+06	42.7783			2.9118	0.91374	3.18669		0.514186
			9	4932386	1.08304e+06	6.01542e+06	18.0043			10089	42265	52354	80.73			1.13253e+06	2.6155e+06	1.46621e+06	29346	5.21424e+06	50.1607			2.41497	0.866813	2.78604		0.56053
			10	5.77178e+06	908992	6.68077e+06	13.6061			14470	43909	58379	75.21			1.74799e+06	2.41553e+06	1.79678e+06	33086	5.96031e+06	40.527			2.65738	0.892159	2.97859		0.566745
UGV-1 P1	32	D3	1	1.79465e+06	161735	1.95638e+06	8.26705	11.0205	3.08424	7398	9854	17253	57.12	66.958	9.03243	971538	490512	529389	9432	1.99144e+06	24.631	32.2946	7.83215	3.03281	1.01792	2.97942	2.93041	0.546688
			2	2.45602e+06	400386	2.85641e+06	14.0171			9203	22323	31526	70.81			1.05608e+06	1.23777e+06	834083	16073	3.12794e+06	39.5715			3.09144	1.09506	2.82308		0.509833
			3	2.76561e+06	221643	2.98725e+06	7.41964			12487	17365	29852	58.17			1.13468e+06	609718	746724	11815	2.49112e+06	24.4757			2.75089	0.833916	3.29877		0.395786
			4	2.37159e+06	308120	2.67971e+06	11.4983			7319	17561	24882	70.58			619029	816121	1.11618e+06	10438	2.55133e+06	31.9881			2.64871	0.952088	2.782		0.4195
			5	2.37442e+06	383343	2.75776e+06	13.9005			5375	19181	24557	78.11			532661	1.02651e+06	956370	11892	2.51554e+06	40.8068			2.67779	0.912168	2.93563		0.484261
UGV-1 P1	32	D6	1	3.5405e+06	333449	3.87395e+06	8.60748	11.9376	4.78103	14337	20020	34357	58.27	71.994	12.4123	1.57725e+06	1.01507e+06	1.175e+06	18243	3.76732e+06	26.944	36.4976	11.4615	3.04414	0.972475	3.1303	3.05737	0.530983
			2	1.19554e+06	332072	1.52762e+06	21.738			2317	13931	16248	85.74			378479	808789	373452	7033	1.56072e+06	51.8215			2.43558	1.02167	2.38392		0.432853
			3	1023012	191277	1.21429e+06	15.7522			2710	10366	13078	79.28			377476	546727	297684	6675	1.22189e+06	44.7445			2.85829	1.00626	2.84052		0.510399
			4	859765	90805.2	950570	9.55271			3354	6946	10300	67.44			140777	189761	549310	1665	879848	21.5674			2.08975	0.9256	2.25773		0.16165
			5	795154	126574	921728	13.7323			3248	6434	9682	66.45			163504	295359	365621	3968	824484	35.8235			2.33348	0.894498	2.60871		0.409833
			6	1.46863e+06	196893	1.66552e+06	11.8217			3463	10523	13986	75.24			437317	551229	422806	7304	1.41135e+06	39.0568			2.79964	0.847393	3.30383		0.522237
			7	1.57026e+06	209519	1.77978e+06	11.7722			4252	11902	16154	73.68			345565	522453	372501	8910	1.24052e+06	42.1157			2.49358	0.697006	3.57756		0.551566
			8	1.53879e+06	54268.1	1.59305e+06	3.40654			7653	6815	14468	47.1			585619	201135	440634	9431	1.22739e+06	16.3873			3.70632	0.770462	4.81052		0.651852
			9	1.6232e+06	231375	1.85457e+06	12.4759			2279	13882	16161	85.9			347140	693635	429163	8653	1.46994e+06	47.1881			2.99788	0.792603	3.78233		0.535425
			10	1.437e+06	168889	1.60589e+06	10.5168			2616	11036	13652	80.84			450738	503506	326040	7189	1.28028e+06	39.3277			2.98128	0.797242	3.73949		0.52659
UGV-1	34	D3	1	7.98402e+06	1.23947e+06	9223489	13.4382	10.1842	5.3258	24144	52307	76451	68.42	60.645	13.6582	2.71532e+06	2.56082e+06	2.64984e+06	48378	7.92599e+06	32.3092	33.9206	12.5567	2.06607	0.859326	2.40429	3.33069	0.632797
			2	6.20995e+06	809770	7.01972e+06	11.5356			28095	48935	77030	63.53			2.31922e+06	2.38378e+06	1.72307e+06	46010	6.42607e+06	37.0954			2.94377	0.91543	3.21572		0.5973
			3	6.55138e+06	1.50624e+06	8.05762e+06	18.6934			30470	53918	84389	63.89			2.64703e+06	3.46103e+06	2.13523e+06	47136	8.2433e+06	41.986			2.2978	1.02304	2.24604		0.558556
			4	5.6343e+06	102249	5.73655e+06	1.78241			56148	23807	79955	29.78			4.51174e+06	595982	3.20708e+06	47843	8.3148e+06	7.16773			5.82875	1.44944	4.02137		0.598374
			5	5.27414e+06	519675	5.79381e+06	8.96949			39359	41867	81227	51.54			3.88951e+06	1.83779e+06	2.13495e+06	45525	7.86225e+06	23.3749			3.53642	1.35701	2.60604		0.560466
			6	7.96291e+06	419241	8.38215e+06	5.0016			32998	43716	76714	56.99			2.45177e+06	2.0551e+06	2.69012e+06	42438	7.19699e+06	28.5549			4.90195	0.85861	5.70917		0.553198
			7	8.05797e+06	1.02758e+06	9.08555e+06	11.31			19625	53671	73305	73.23			2.39497e+06	2.96546e+06	2.08886e+06	39371	7.4493e+06	39.8086			2.88588	0.819906	3.51977		0.537085
			8	7.48514e+06	930361	8.4155e+06	11.0553			22385	45928	68313	67.23			1.7003e+06	2.27794e+06	1.58564e+06	37681	5.56387e+06	40.9416			2.44845	0.661146	3.70334		0.551593
			9	6.96399e+06	300388	7.26438e+06	4.13508			32625	38004	70632	53.81			1.85527e+06	1.97149e+06	1.97074e+06	42018	5.7975e+06	34.0059			6.56315	0.798072	8.22375		0.594886
			10	7.77741e+06	1.47273e+06	9.25014e+06	15.9212			17429	61890	79320	78.03			1.27343e+06	3.43091e+06	1.65377e+06	40707	6.3581e+06	53.9612			2.32962	0.687352	3.38926		0.5132
UGV-1	34	D6	1	8.18843e+06	678800	8.86723e+06	7.65516	10.7921	6.1798	45111	28163	73274	38.44	57.002	11.0058	3.52868e+06	1.59806e+06	3.88438e+06	49507	9.01112e+06	17.7343	28.4089	9.36501	2.35424	1.01623	2.31664	2.63239	0.675642
			2	7098081	1.63873e+06	8.73681e+06	18.7566			21147	61254	82402	74.34			2.54963e+06	3.73835e+06	1.73146e+06	46834	8.01945e+06	46.6161			2.28125	0.917892	2.48532		0.56836
			3	7.58101e+06	2.05493e+06	9.63593e+06	21.3257			28746	62806	91552	68.6			3.40766e+06	4.04943e+06	3.07578e+06	52149	1.05329e+07	38.4457			1.9706	1.09308	1.80279		0.569611
			4	7.7577e+06	696929	8.45463e+06	8.24317			43441	31441	74882	41.99			5.3124e+06	1.97029e+06	2.51578e+06	53764	9.79847e+06	20.1081			2.8271	1.15895	2.43937		0.717983
			5	7.20804e+06	1.60669e+06	8.81473e+06	18.2273			31398	42993	74391	57.79			4.36711e+06	3.3646e+06	2.30404e+06	51020	1.00357e+07	33.5262			2.09412	1.13852	1.83934		0.685836
			6	1.07729e+07	633132	1.1406e+07	5.55086			32637	38442	71081	54.08			4.79713e+06	2.50098e+06	3.663e+06	43809	1.09611e+07	22.8169			3.95017	0.960993	4.11051		0.616325
			7	1.19605e+07	812395	1.27728e+07	6.36033			35849	43383	79234	54.75			5.99566e+06	2.1978e+06	3.48329e+06	42643	1.16767e+07	18.822			2.70533	0.914185	2.95928		0.538191
			8	1.08987e+07	854035	1.17527e+07	7.26672			30912	38390	69302	55.4			5.38099e+06	2.70237e+06	2.56547e+06	47179	1.06488e+07	25.3771			3.16423	0.906076	3.49224		0.680774
			9	1.082e+07	532099	1.13521e+07	4.68724			29704	44332	74037	59.88			4.25561e+06	2.8276e+06	2.91683e+06	49519	1e+07	28.2759			5.31404	0.8809	6.03252		0.668841
			10	1.0973e+07	1.19864e+06	1.21717e+07	9.84779			28339	52064	80403	64.75			5.02983e+06	3.54684e+06	2.38149e+06	45905	1.09582e+07	32.3671			2.95905	0.9003	3.28673		0.570936
UGV-1 P1	34	D3	1	5823715	4.41908e+06	1.02428e+07	43.1433	7.91241	12.6183	454	61532	61986	99.27	34.023	23.9599	516749	7.38804e+06	1.58722e+06	36866	9.492e+06	77.8343	17.5352	21.3815	1.67185	0.9267	1.80409	2.21617	0.594747
			2	4.95909e+06	259753	5218839	4.97722			37908	14349	52257	27.46			5.0708e+06	913719	2.18188e+06	37468	8.16639e+06	11.1888			3.51764	1.56479	2.248		0.716995
			3	3.71535e+06	161306	3.87666e+06	4.16094			42337	11795	54132	21.79			5.96735e+06	658272	2.13035e+06	36835	8.75597e+06	7.51798			4.0809	2.25864	1.8068		0.680466
			4	2231660	249445	2.4811e+06	10.0538			36641	15545	52186	29.79			4.94406e+06	701146	2.57175e+06	36532	8.21696e+06	8.53292			2.81083	3.31181	0.848727		0.700034
			5	4197395	183363	4380758	4.18565			40346	12184	52530	23.19			4.95393e+06	1.04905e+06	1.62168e+06	35711	7.62466e+06	13.7587			5.72118	1.74049	3.28711		0.679821
			6	8.91212e+06	94630.6	9.00675e+06	1.05066			41138	8141	49279	16.52			5.60455e+06	548401	2.44305e+06	37644	8.596e+06	6.37972			5.79517	0.954395	6.07209		0.763895
			7	8592087	369446	8.96153e+06	4.12258			28667	21263	49930	42.59			4.76881e+06	1.18759e+06	1.90526e+06	34755	7.86167e+06	15.1061			3.21452	0.877268	3.66424		0.696075
			8	8.34728e+06	259850	8.60713e+06	3.01901			34161	14034	48195	29.12			4.71189e+06	936973	2.26199e+06	36872	7.91084e+06	11.8442			3.60582	0.919103	3.92319		0.765059
			9	8.1306e+06	165452	8.29605e+06	1.99435			35009	9760	44769	21.8			4.79124e+06	701750	1.94154e+06	36988	7.43453e+06	9.43906			4.24141	0.896153	4.73291		0.826197
			10	7.54262e+06	186788	7.72941e+06	2.41659			37152	14958	52110	28.7			4.21237e+06	1.01728e+06	2.16853e+06	37667	7.39818e+06	13.7504			5.44619	0.957147	5.69003		0.722836
UGV-1 P1	34	D6	1	6.32735e+06	6091640	1.2419e+07	49.051	7.88366	14.6019	1121	95721	96842	98.84	37.548	23.2627	742825	8.72823e+06	2.4393e+06	51401	1.19104e+07	73.2827	17.5381	20.1319	1.43282	0.959043	1.49401	2.22462	0.530772
			2	9.13169e+06	382644	9.51433e+06	4.02176			55175	28538	83713	34.09			6.30754e+06	1.38154e+06	2.21492e+06	52333	9.904e+06	13.9493			3.61051	1.04096	3.46846		0.625148
			3	7.68117e+06	669317	8.35049e+06	8.0153			45203	42066	87269	48.2			6.01866e+06	2.36943e+06	2.74492e+06	53736	1.1133e+07	21.2829			3.54007	1.33322	2.65529		0.615751
			4	6.41731e+06	283300	6.70061e+06	4.22797			57897	24167	82064	29.45			7.40542e+06	1.23601e+06	2.90279e+06	49625	1.15442e+07	10.7067			4.36289	1.72286	2.53235		0.604711
			5	7.09133e+06	173800	7.26513e+06	2.39224			62941	18282	81223	22.51			7.34452e+06	796553	2.89325e+06	53459	1.10343e+07	7.21886			4.58317	1.51881	3.01761		0.658176
			6	1.19092e+07	148365	1.20576e+07	1.23047			56301	14167	70468	20.1			7.7959e+06	757221	2.81493e+06	39311	1.13681e+07	6.66095			5.10378	0.942815	5.41334		0.557856
			7	1.16753e+07	279852	1.19552e+07	2.34084			50211	27149	77361	35.09			7.97814e+06	976181	2.29776e+06	48292	1.12521e+07	8.67556			3.48821	0.941187	3.70618		0.624242
			8	12499941	245020	12744961	1.92249			57715	17976	75691	23.75			7.80449e+06	934329	3.1936e+06	45725	1.19324e+07	7.83017			3.81328	0.936246	4.07294		0.604101
			9	1.1165e+07	490730	1.16557e+07	4.21021			44544	29356	73900	39.72			6.26354e+06	1.76405e+06	2.67944e+06	41686	1.0707e+07	16.4756			3.59475	0.918609	3.91325		0.564087
			10	1.21777e+07	175952	12353608	1.4243			63653	19803	83456	23.73			7.96577e+06	1.04658e+06	2.24329e+06	48158	1.12556e+07	9.29827			5.9481	0.911122	6.52832		0.577047
UGV-1	36	D3	1	3.36448e+06	44.46	3364524	0.00132144	0.0374182	0.0329376	44454	46	44500	0.1034	1.65325	2.09457	4.07462e+06	3080.75	4.47769e+06	18453	8.55539e+06	0.0360094	0.918234	1.07325	69.2926	2.54282	27.2503	24.5398	0.414674
			2	4.07252e+06	57.87	4072574	0.00142097			48113	107	48220	0.2219			3.30169e+06	3055.49	3.21628e+06	18441	6.52103e+06	0.0468559			52.7991	1.6012	32.9746		0.382435
			3	3312704	183.3	3.31289e+06	0.00553294			49457	66	49523	0.1333			4.05833e+06	4368.61	2.87572e+06	28073	6.93842e+06	0.0629627			23.8331	2.09437	11.3796		0.566868
			4	2.66685e+06	476.7	2.66733e+06	0.0178718			37780	48	37829	0.1269			2.40555e+06	6211.36	2.85942e+06	15349	5.27118e+06	0.117836			13.0299	1.9762	6.59341		0.405747
			5	2125341	584.41	2.12593e+06	0.0274897			39750	146	39899	0.366			2.88526e+06	9126.83	2.31767e+06	22463	5.21206e+06	0.17511			15.6172	2.45167	6.37002		0.562997
			6	5.06991e+06	4162	5.07407e+06	0.0820249			34469	430	34900	1.232			1.66749e+06	21266.9	2.65951e+06	10741	4.34826e+06	0.48909			5.10979	0.856957	5.96271		0.307765
			7	4.00791e+06	1490.5	4.0094e+06	0.0371751			33939	1164	35103	3.316			2.50205e+06	60961.5	1.15686e+06	23320	3.71987e+06	1.63881			40.9001	0.927787	44.0834		0.664331
			8	4.21847e+06	3468.5	4.22194e+06	0.0821542			28516	765	29283	2.613			2.55941e+06	63335.8	1.10787e+06	23234	3.73062e+06	1.69773			18.2603	0.883627	20.6651		0.79343
			9	4.05366e+06	3172.9	4.05683e+06	0.0782113			33400	2375	35776	6.639			2.33312e+06	122644	1.48857e+06	23309	3.94434e+06	3.10938			38.6537	0.972271	39.7561		0.651526
			10	3763242	1542.8	3.76478e+06	0.0409798			36517	662	37180	1.781			2.57815e+06	71184.8	1.28664e+06	23612	3.93598e+06	1.80857			46.14	1.04547	44.1332		0.635073
UGV-1	36	D6	1	5.75039e+06	251.61	5.75064e+06	0.00437534	0.0179889	0.00765483	54611	224	54835	0.4085	0.76728	0.752558	4.26883e+06	5584.66	7.2198e+06	24002	1.14942e+07	0.0485867	0.349147	0.339307	22.1957	1.99877	11.1047	19.409	0.437713
			2	3.88433e+06	758.3	3.88509e+06	0.0195182			52260	160	52422	0.3052			5.49529e+06	5812.09	4.04871e+06	33294	9.54981e+06	0.0608608			7.66463	2.45807	3.11815		0.635115
			3	4985269	865.5	4.98613e+06	0.0173581			47550	107	47657	0.2245			4.64536e+06	5869.18	4.92695e+06	29342	9.57818e+06	0.0612766			6.78126	1.92096	3.53013		0.615691
			4	2.13106e+06	362.07	2.13142e+06	0.0169872			44653	57	44710	0.1275			6.00331e+06	2295.7	3.939e+06	32010	9.94461e+06	0.0230848			6.34047	4.66571	1.35895		0.715947
			5	2.61476e+06	428.4	2.61519e+06	0.0163812			45279	92	45373	0.2028			5.7909e+06	4334.77	4.06156e+06	31554	9.85679e+06	0.0439775			10.1185	3.76905	2.68463		0.695436
			6	1.00979e+07	1642.9	1.00996e+07	0.016267			45907	256	46163	0.5546			5.85459e+06	36140.5	3.6681e+06	31762	9.55883e+06	0.378085			21.998	0.946459	23.2424		0.68804
			7	8.15869e+06	939.07	8.15963e+06	0.0115087			43118	1078	44196	2.439			5.63992e+06	64020.7	3.16052e+06	40632	8.86446e+06	0.722218			68.1746	1.08638	62.7539		0.919359
			8	9.45056e+06	1655.6	9.45221e+06	0.0175155			42129	359	42488	0.8449			5.77008e+06	58689.8	3.19479e+06	36636	9.02356e+06	0.650406			35.4492	0.95465	37.1332		0.862267
			9	7803066	2428.8	7.80549e+06	0.0311165			44426	770	45197	1.704			5.08684e+06	76848.6	3.71822e+06	37479	8.88191e+06	0.865226			31.6406	1.1379	27.806		0.829236
			10	7.19004e+06	2075.7	7.19211e+06	0.0288608			46587	405	46992	0.8618			5.89075e+06	56207.2	2.86647e+06	37365	8.81343e+06	0.637746			27.0787	1.22543	22.0973		0.795135
UGV-1 P1	36	D3	1	2.4779e+06	13158.5	2.49106e+06	0.528229	0.325254	0.310431	26278	659	26937	2.446	1.49564	0.445046	3.82494e+06	39484.7	2.40859e+06	18879	6.27301e+06	0.629438	0.604136	0.315475	3.0007	2.51821	1.1916	1.85743	0.700858
			2	933011	8383	941394	0.890488			31374	483	31857	1.516			4.27231e+06	29642.2	1.22954e+06	20454	5.5315e+06	0.535881			3.53599	5.87586	0.601783		0.642057
			3	2.57263e+06	1140.6	2573771	0.0443163			17684	180	17868	1.008			1.95181e+06	7388.96	2.29423e+06	9061	4.25344e+06	0.173718			6.47814	1.65261	3.91995		0.507108
			4	266086	2150.8	268237	0.801829			44493	340	44833	0.7584			4.15446e+06	17078.2	1.09312e+06	24328	5.26466e+06	0.324392			7.94038	19.6269	0.404565		0.542636
			5	2.63675e+06	7712.5	2.64447e+06	0.291647			36713	563	37276	1.51			5.58476e+06	30529.2	2.24814e+06	27059	7.86343e+06	0.388242			3.9584	2.97354	1.33121		0.725909
			6	602711	205.83	602917	0.034139			2751	42	2793	1.504			407400	1631.38	228656	2112	637688	0.255828			7.92588	1.05767	7.4937		0.756176
			7	4533449	11501.1	4.54495e+06	0.253052			42017	727	42744	1.701			5.45356e+06	62184.7	1.94399e+06	29767	7.45973e+06	0.833606			5.40685	1.64132	3.2942		0.696402
			8	4815704	4695.7	4.8204e+06	0.0974131			46381	798	47179	1.691			5.179e+06	65218.1	2.17605e+06	31706	7.42027e+06	0.878918			13.8889	1.53935	9.02259		0.672036
			9	4.89411e+06	7936.6	4902045	0.161904			53912	792	54704	1.448			5.18549e+06	79796.5	2.53972e+06	35150	7.80501e+06	1.02238			10.0542	1.59219	6.31471		0.642549
			10	3.86532e+06	5788.1	3.87111e+06	0.14952			53711	748	54459	1.374			4.97454e+06	70457.6	2.00808e+06	35607	7.05308e+06	0.998962			12.1728	1.82198	6.68111		0.653831
UGV-1 P1	36	D6	1	2.81613e+06	5212.8	2.82135e+06	0.184763	0.189189	0.228924	28827	460	29288	1.571	1.30727	0.523117	2.06276e+06	23804.6	2.95372e+06	12414	5.04029e+06	0.472286	0.71544	0.476724	4.56656	1.78648	2.55618	3.78161	0.42386
			2	1.57337e+06	1916.2	1.57528e+06	0.121642			27958	234	28192	0.83			2.41104e+06	11739.3	1.82341e+06	15286	4.24619e+06	0.276466			6.12634	2.69551	2.27279		0.542211
			3	1.04653e+06	4758.4	1051290	0.452625			24579	573	25155	2.278			2.62096e+06	22515.1	1.08253e+06	16683	3.72601e+06	0.604267			4.73165	3.54423	1.33503		0.663208
			4	171480	1269.1	172749	0.73465			23372	170	23543	0.7221			2.09606e+06	8096.52	695737	14902	2.79989e+06	0.289173			6.37973	16.2079	0.39362		0.632969
			5	1.47849e+06	1672.3	1.48017e+06	0.112981			23034	265	23300	1.137			2.46521e+06	7006.43	1.38154e+06	15789	3.85376e+06	0.181808			4.1897	2.6036	1.60919		0.677639
			6	2.81514e+06	560.47	2.8157e+06	0.0199051			20784	134	20918	0.6406			1.82388e+06	17821.1	1.19198e+06	12870	3.03369e+06	0.587441			31.7967	1.07742	29.512		0.61526
			7	2.93375e+06	3739.5	2.93749e+06	0.127303			18586	281	18868	1.489			2.00887e+06	44175.4	818290	13240	2.87133e+06	1.5385			11.8132	0.977478	12.0854		0.701717
			8	2.37282e+06	1211	2.37403e+06	0.0510103			21095	383	21480	1.783			1.74946e+06	34085.7	745359	13600	2.5289e+06	1.34785			28.1467	1.06524	26.423		0.633147
			9	2067077	1159.3	2.06824e+06	0.0560526			16719	269	16988	1.583			1.39344e+06	25083.1	700665	10290	2.11919e+06	1.18362			21.6365	1.02463	21.1163		0.605722
			10	1636117	506.73	1.63662e+06	0.0309619			15718	165	15883	1.039			1.22532e+06	12470.3	615180	9521	1.85297e+06	0.672994			24.6095	1.13219	21.7362		0.599446
